# Supplementary material for: A re-entrant glass transition in colloidal disks with adsorbing polymer
Source: Royal Society of Chemistry journal article supplement (doi:10.1039/c2sm25311a), 2012-01-01
Supplement: c2sm25311a.pdf [file c2sm25311a.pdf]

## Supplementary Information:

### A re-entrant glass transition in colloidal disks with adsorbing polymer

Anand K. Atmuri, George A. Peklaris, Suhasini Kishore, Surita R. Bhatia\*

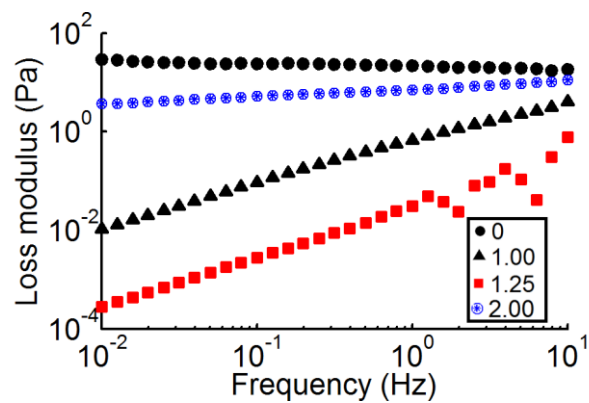

(a)

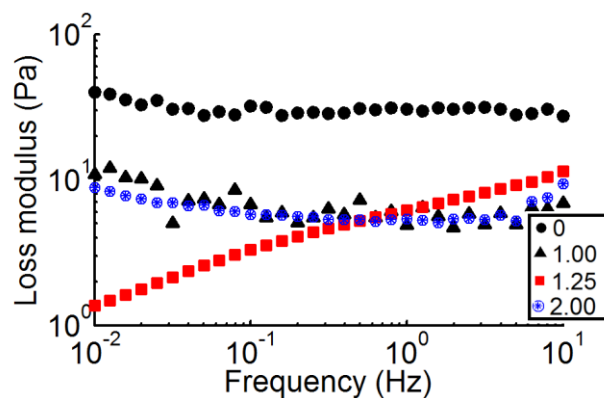

(b)

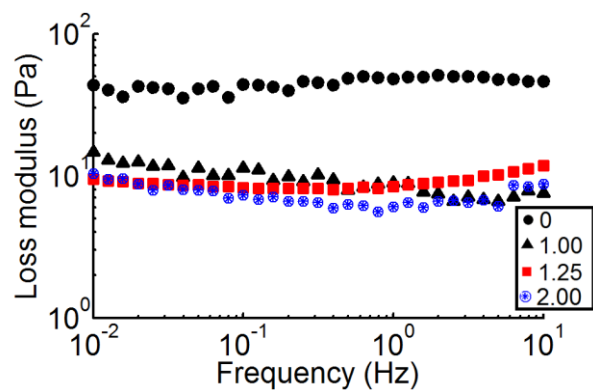

(c)

Figure S1. Loss modulus as a function of frequency after different aging days

(a) 21 days (b) 60 days (c) 90 days.

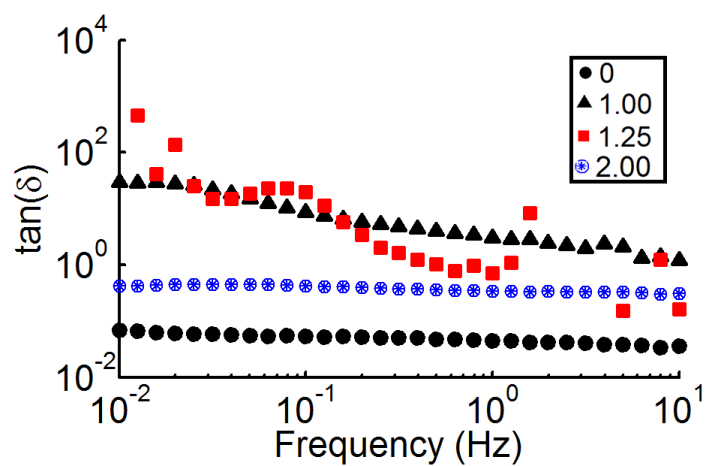

(a)

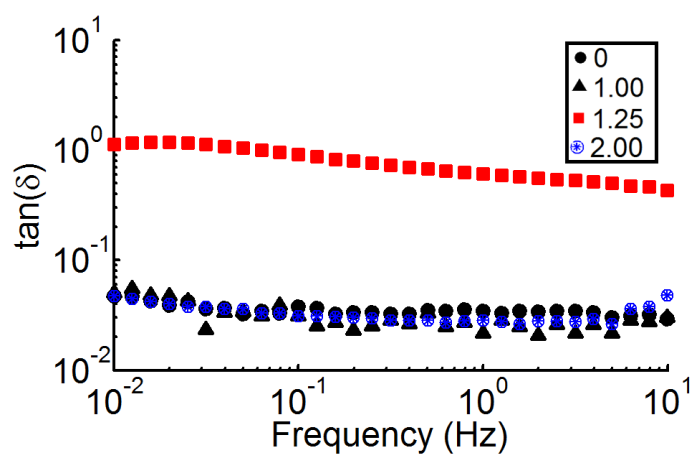

(b)

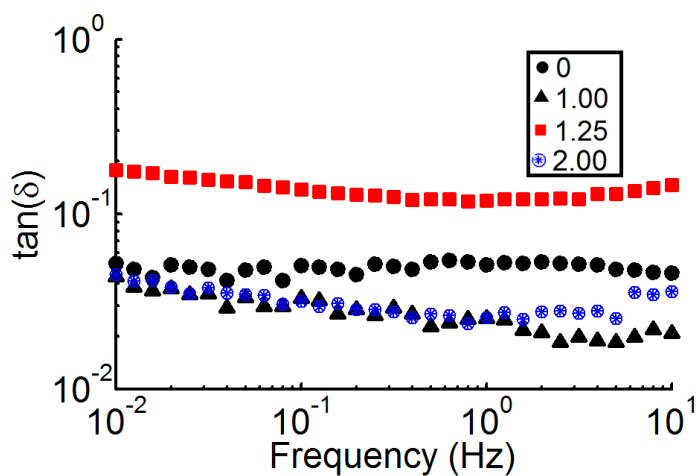

(c)

Figure S2.  $\tan(\delta)$  vs frequency after different aging days (a) 21 days (b) 60 days (c) 90 days.
